# Supplementary material for: Cadmium(ii) coordination polymers based on substituted malonic acid: synthesis, characterization and photoluminescence properties
Source: Royal Society of Chemistry journal article supplement (doi:10.1039/c7qi00212b), 2017-01-01
Supplement: c7qi00212b1.pdf [file c7qi00212b1.pdf]

# Supporting Information

for the

## Cadmium(II) Coordination Polymers Based on Substituted Malonic Acid: Synthesis, Characterization and Photoluminescent Properties

Mariadel Déniz,<sup>a</sup> Jorge Pasán,<sup>a</sup> Beatriz Rasines,<sup>a</sup> Pablo Lorenzo-Luis,<sup>b</sup> Fernando Lahoz,<sup>c</sup> Corina Vera-Gonzales,<sup>d</sup> Miguel Julve,<sup>e</sup> Catalina Ruiz-Pérez<sup>a,\*</sup>

<sup>a</sup> *Laboratorio de Rayos X y Materiales Moleculares (MATMOL), Departamento de Física, Facultad de Ciencias (Sección Física), Universidad de La Laguna, Edificio de Física y Matemáticas, Apdo. 456, E-38200 La Laguna, Tenerife, Spain, Email: [caruiz@ull.edu.es](mailto:caruiz@ull.edu.es)*

<sup>b</sup> *Instituto de Ciencia Molecular (ICMol)/Departament de Química Inorgànica, Universitat de València, C/ Catedrático José Beltrán 2, 46980 Paterna, València, Spain*

<sup>c</sup> *Departamento de Química, Facultad de Ciencias (Sección Química), Universidad de La Laguna, Avda. Astrofísico Francisco Sánchez s/n, E-38204 La Laguna, Tenerife, Spain.*

<sup>d</sup> *Departamento de Física, Facultad de Ciencias (Sección Física), Universidad de La Laguna, Edificio de Física y Matemáticas, Apdo. 456, E-38200 La Laguna, Tenerife, Spain.*

<sup>e</sup> *Departamento de Química, Facultad de Ciencias Naturales y Formales, Universidad Nacional de San Agustín de Arequipa (UNSA), Arequipa, Peru.*

**Table S1.** Summary of the Crystal Data and Refinement Details for complexes **1-4**

|                                                               | <b>1·0.5H<sub>2</sub>O</b>                                        | <b>2</b>                                       | <b>3</b>                                        | <b>4</b>                                         |
|---------------------------------------------------------------|-------------------------------------------------------------------|------------------------------------------------|-------------------------------------------------|--------------------------------------------------|
| Formula                                                       | C <sub>24</sub> H <sub>37</sub> Cd <sub>6</sub> O <sub>30.5</sub> | C <sub>5</sub> H <sub>8</sub> CdO <sub>5</sub> | C <sub>7</sub> H <sub>12</sub> CdO <sub>5</sub> | C <sub>10</sub> H <sub>10</sub> CdO <sub>5</sub> |
| M                                                             | 1487.82                                                           | 260.51                                         | 286.56                                          | 322.58                                           |
| Crystal system                                                | trigonal                                                          | monoclinic                                     | orthorhombic                                    | orthorhombic                                     |
| Space group                                                   | R-3                                                               | <i>P21/c</i>                                   | <i>Pbca</i>                                     | <i>Pbca</i>                                      |
| <i>a</i> , Å                                                  | 17.908(2)                                                         | 10.520(2)                                      | 9.2530(19)                                      | 9.39660(10)                                      |
| <i>b</i> , Å                                                  | 17.908(2)                                                         | 9.2650(19)                                     | 7.8740(16)                                      | 7.88530(10)                                      |
| <i>c</i> , Å                                                  | 10.9400(9)                                                        | 7.8960(16)                                     | 25.531(5)                                       | 29.8510(4)                                       |
| $\alpha$ deg                                                  | 90                                                                | 90                                             | 90                                              | 90                                               |
| $\beta$ deg                                                   | 90                                                                | 104.74(3)                                      | 90                                              | 90                                               |
| $\gamma$ deg                                                  | 120.00                                                            | 90                                             | 90                                              | 90                                               |
| <i>V</i> , Å <sup>3</sup>                                     | 3038.3(6)                                                         | 744.3(3)                                       | 1860.1(7)                                       | 2211.81(5)                                       |
| Z                                                             | 3                                                                 | 4                                              | 8                                               | 8                                                |
| $\rho_{\text{calc}}$ (Mg m <sup>-3</sup> )                    | 2.418                                                             | 2.325                                          | 2.046                                           | 1.937                                            |
| <i>F</i> (000)                                                | 2064                                                              | 504                                            | 1120                                            | 1264                                             |
| $\mu$ (Mo-K $\alpha$ ) (mm <sup>-1</sup> )                    | 3.199                                                             | 3.162                                          | 2.541                                           | 1.976                                            |
| Number parameters/restrains                                   | 95/6                                                              | 108/2                                          | 120/0                                           | 153/2                                            |
| Goodness-of-fit ( <i>S</i> )                                  | 1.338                                                             | 1.103                                          | 1.088                                           | 1.393                                            |
| <i>R</i> <i>I</i> , <i>I</i> > 2 $\sigma$ ( <i>I</i> ) (all)  | 0.0360 (0.0382)                                                   | 0.0444 (0.0447)                                | 0.0401 (0.0409)                                 | 0.0363 (0.0426)                                  |
| <i>wR</i> 2, <i>I</i> > 2 $\sigma$ ( <i>I</i> ) (all)         | 0.0729 (0.0735)                                                   | 0.1239 (0.1243)                                | 0.1091 (0.1100)                                 | 0.0616 (0.0633)                                  |
| Max/min electron density (e Å <sup>-3</sup> )                 | 0.696 / -1.053                                                    | 1.366 / -2.761                                 | 1.057 / -2.241                                  | 0.995 / -0.837                                   |
| Measured reflections ( <i>R</i> <sub>int</sub> )              | 1714 (0.060)                                                      | 3686 (0.0444)                                  | 14442 (0.0693)                                  | 21771 (0.0243)                                   |
| Independent reflections [ <i>I</i> > 2 $\sigma$ ( <i>I</i> )] | 1711 (1662)                                                       | 1553 (1526)                                    | 1902 (1816)                                     | 3090 (2715)                                      |

**Table S2.** Selected bond lengths [Å] and angles [deg] for **1**.

|                  |            |                   |            |
|------------------|------------|-------------------|------------|
| Cd(1)-O(2)       | 2.272(3)   | Cd(1)-O(4)        | 2.276(3)   |
| Cd(1)-O(1a)      | 2.399(3)   | Cd(1)-O(4b)       | 2.637(3)   |
| Cd(1)-O(2a)      | 2.465(3)   | Cd(1)-O(1W)       | 2.287(3)   |
| Cd(1)-O(3b)      | 2.277(3)   |                   |            |
| O(2)-Cd(1)-O(4)  | 84.67(10)  | O(1a)-Cd(1)-O(1W) | 86.76(13)  |
| O(2)-Cd(1)-O(1W) | 86.60(11)  | O(1a)-Cd(1)-O(2a) | 53.19(10)  |
| O(2)-Cd(1)-O(1a) | 78.68(11)  | O(1a)-Cd(1)-O(3b) | 139.93(11) |
| O(2)-Cd(1)-O(2a) | 131.86(10) | O(1a)-Cd(1)-O(4b) | 167.24(10) |
| O(2)-Cd(1)-O(3b) | 141.37(11) | O(2a)-Cd(1)-O(1W) | 89.43(11)  |
| O(2)-Cd(1)-O(4b) | 89.29(10)  | O(2a)-Cd(1)-O(3b) | 86.74(10)  |
| O(4)-Cd(1)-O(1W) | 171.12(10) | O(2a)-Cd(1)-O(4b) | 138.55(9)  |
| O(4)-Cd(1)-O(1a) | 89.95(12)  | O(3b)-Cd(1)-O(1W) | 93.32(12)  |
| O(4)-Cd(1)-O(2a) | 131.86(10) | O(3b)-Cd(1)-O(4b) | 52.12(10)  |
| O(4)-Cd(1)-O(3b) | 94.51(12)  | O(4b)-Cd(1)-O(1W) | 88.29(12)  |
| O(4)-Cd(1)-O(4b) | 93.19(15)  |                   |            |

*Symmetry codes:* (a) =  $-y+1/3, x-y+2/3, z-1/3$ , (b) =  $x-y+2/3, x+1/3, -z+1/3$ .

**Table S3.** Selected bond lengths [Å] and angles [deg] for **2**

|                   |            |                   |            |
|-------------------|------------|-------------------|------------|
| Cd(1)-O(1a)       | 2.218(4)   | Cd(1)-O(4)        | 2.401(3)   |
| Cd(1)-O(2)        | 2.264(4)   | Cd(1)-O(4b)       | 2.279(3)   |
| Cd(1)-O(3c)       | 2.389(4)   | Cd(1)-O(1W)       | 2.279(3)   |
| O(1a)-Cd(1)-O(2)  | 81.76(13)  | O(2)-Cd(1)-O(4b)  | 149.76(13) |
| O(1a)-Cd(1)-O(4)  | 156.96(12) | O(4)-Cd(1)-O(1W)  | 78.26(12)  |
| O(1a)-Cd(1)-O(1W) | 118.65(14) | O(4)-Cd(1)-O(3c)  | 80.54(12)  |
| O(1a)-Cd(1)-O(3c) | 84.82(14)  | O(4)-Cd(1)-O(4b)  | 73.62(12)  |
| O(1a)-Cd(1)-O(4b) | 121.86(13) | O(1W)-Cd(1)-O(3c) | 156.17(12) |
| O(2)-Cd(1)-O(4)   | 78.64(11)  | O(1W)-Cd(1)-O(4b) | 81.74(12)  |
| O(2)-Cd(1)-O(1W)  | 104.32(15) | O(3c)-Cd(1)-O(4b) | 78.64(11)  |
| O(2)-Cd(1)-O(3c)  | 81.86(16)  |                   |            |

*Symmetry codes:* (a) =  $x, -y+1/2, z-1/2$ ; (b) = a(2) =  $-x+2, -y+1, -z+1$ ; (c) =  $-x+2, y-1/2, -z+3/2$

a(2) = nomenclature of symmetry used for clarity in the manuscript

**Table S3.** Selected bond lengths [Å] and angles [deg] for **3** and **4**.

|                   | <b>3</b>  | <b>4</b>   |
|-------------------|-----------|------------|
| Cd(1)-O(2)        | 2.406(2)  | 2.411(2)   |
| Cd(1)-O(4)        | 2.267(3)  | 2.263(2)   |
| Cd(1)-O(1f)       | 2.410(2)  | 2.461(3)   |
| Cd(1)-O(2e)       | 2.279(2)  | 2.261(2)   |
| Cd(1)-O(3d)       | 2.218(3)  | 2.246(2)   |
| Cd(1)-O(1W)       | 2.279(3)  | 2.318(3)   |
| O(2)-Cd(1)-O(4)   | 78.71(8)  | 78.11(8)   |
| O(2)-Cd(1)-O(1f)  | 79.56(8)  | 83.35(8)   |
| O(2)-Cd(1)-O(2e)  | 155.95(9) | 75.44(9)   |
| O(2)-Cd(1)-O(3d)  | 155.95(9) | 155.87(8)  |
| O(2)-Cd(1)-O(1W)  | 78.39(8)  | 76.43(9)   |
| O(4)-Cd(1)-O(1f)  | 82.04(9)  | 78.35(9)   |
| O(4)-Cd(1)-O(2e)  | 149.01(8) | 148.82(9)  |
| O(4)-Cd(1)-O(3d)  | 81.46(9)  | 79.35(9)   |
| O(4)-Cd(1)-O(1W)  | 104.89(9) | 104.38(10) |
| O(1W)-Cd(1)-O(1f) | 155.01(8) | 158.41(9)  |
| O(1W)-Cd(1)-O(2e) | 81.29(8)  | 85.20(10)  |
| O(1W)-Cd(1)-O(3d) | 120.18(9) | 117.80(10) |
| O(1f)-Cd(1)-O(2e) | 81.07(8)  | 82.45(8)   |
| O(1f)-Cd(1)-O(3d) | 84.35(9)  | 83.79(9)   |
| O(2e)-Cd(1)-O(3d) | 122.26(9) | 122.80(9)  |

*Symmetry codes:* (d) =  $-x+3/2, y-1/2, z$ ; (e) = a(**3**) = a(**4**) =  $-x+1, -y, -z+1$ ; (f) =  $x+1/2, -y+1/2, -z+1$

a(**3**) = a(**4**) = nomenclature of symmetry used for clarity in the manuscript

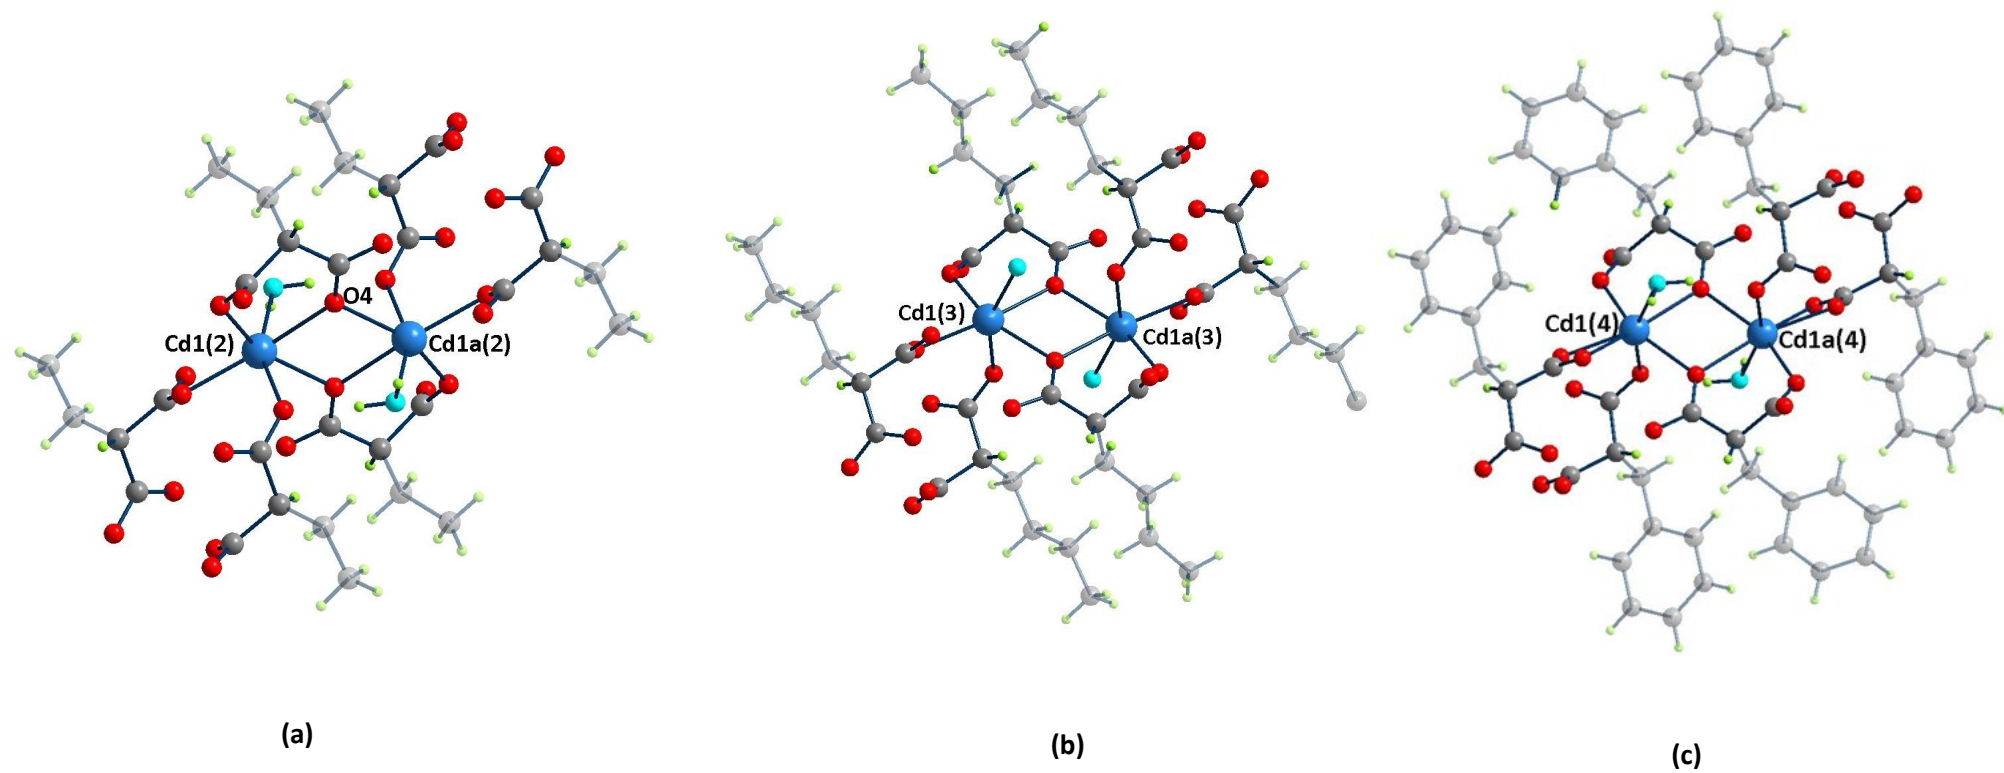

**Fig. S1.** Detail of the dinuclear units present in complexes **2** (a), **3** (b) and **4** (c)

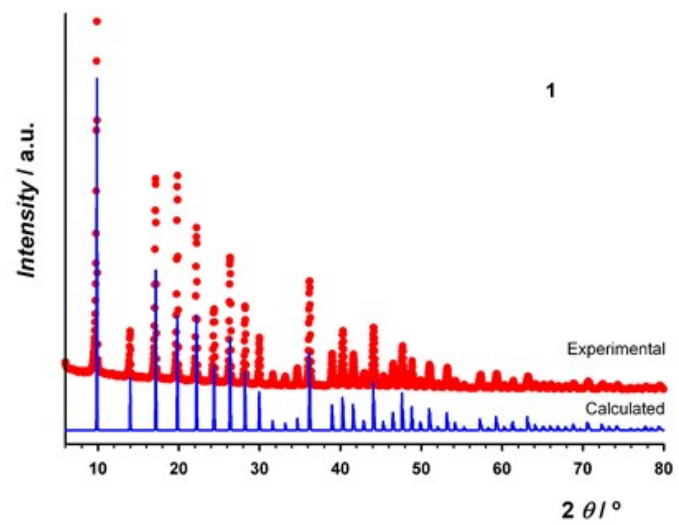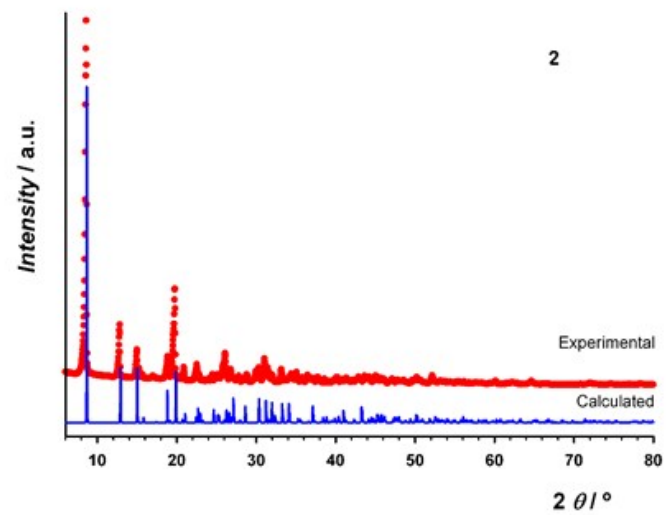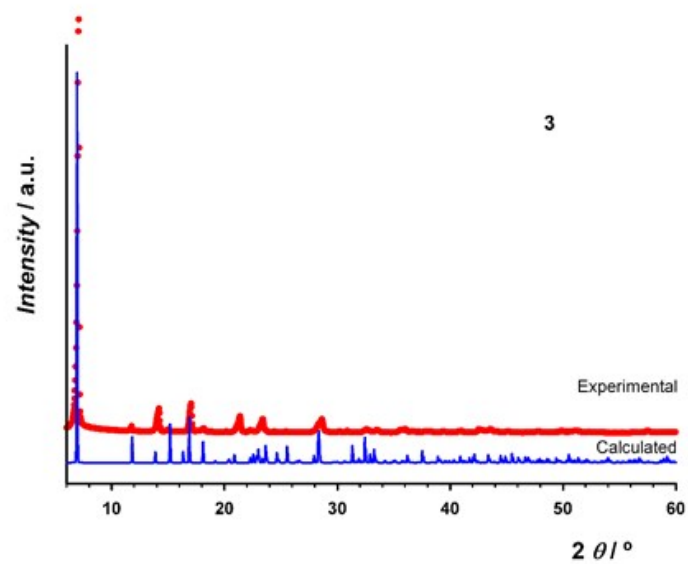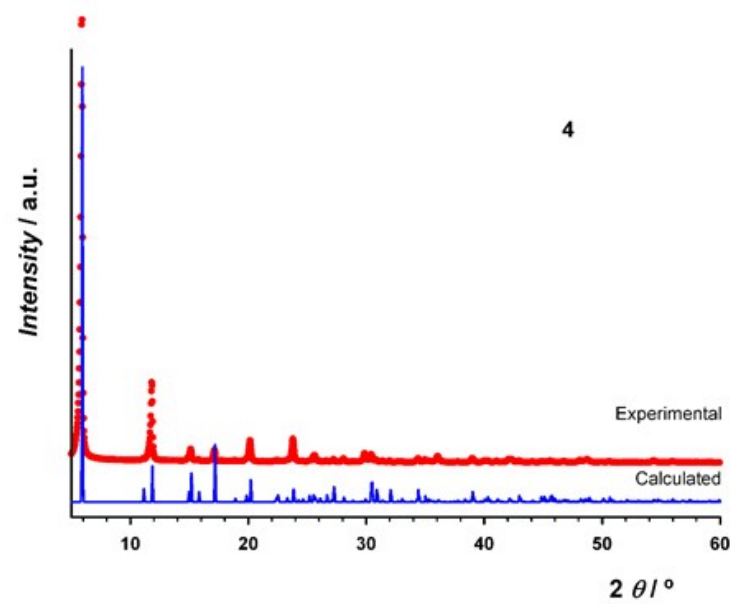

Fig. S2. X-ray diffraction patterns for complexes 1-4.

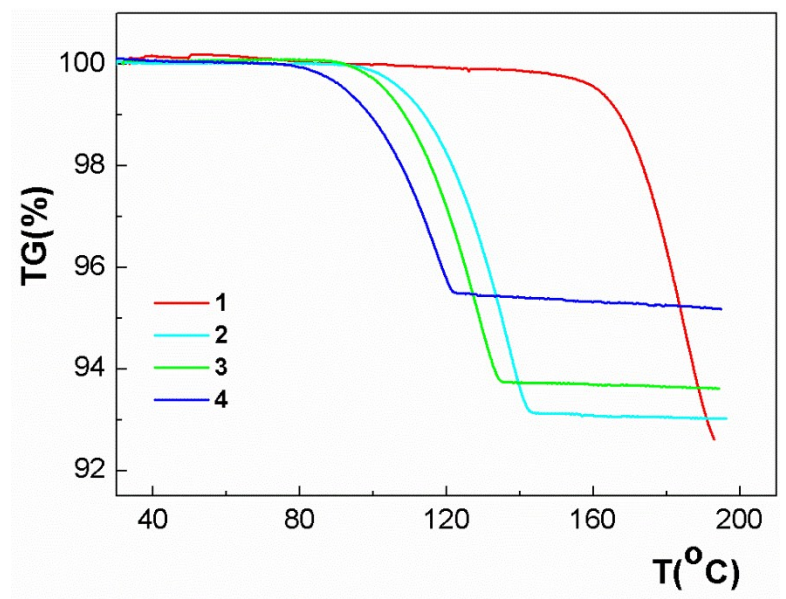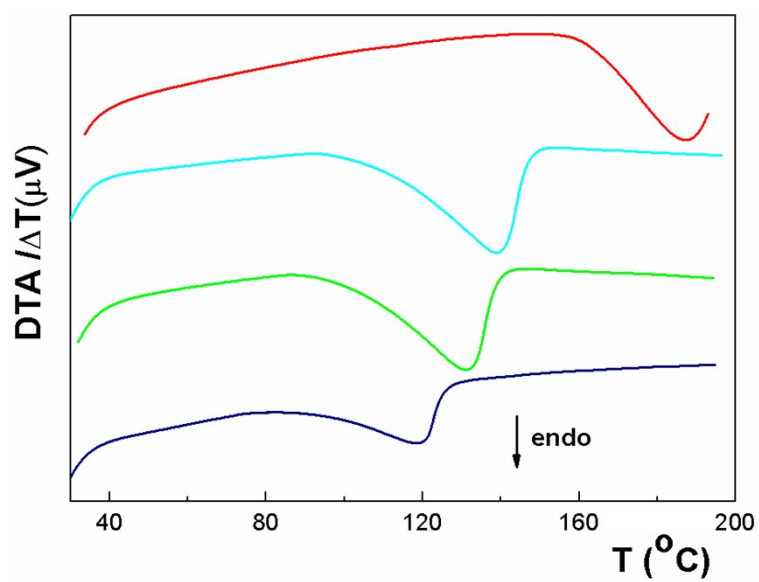

**Fig. S3.** TG/DTA curves of the complexes **1** (red), **2** (cyan), **3** (green) and **4** (blue). TG = mass loss (percent); DTA =  $\Delta T/(\mu V)$  ( $\downarrow$  endo process).

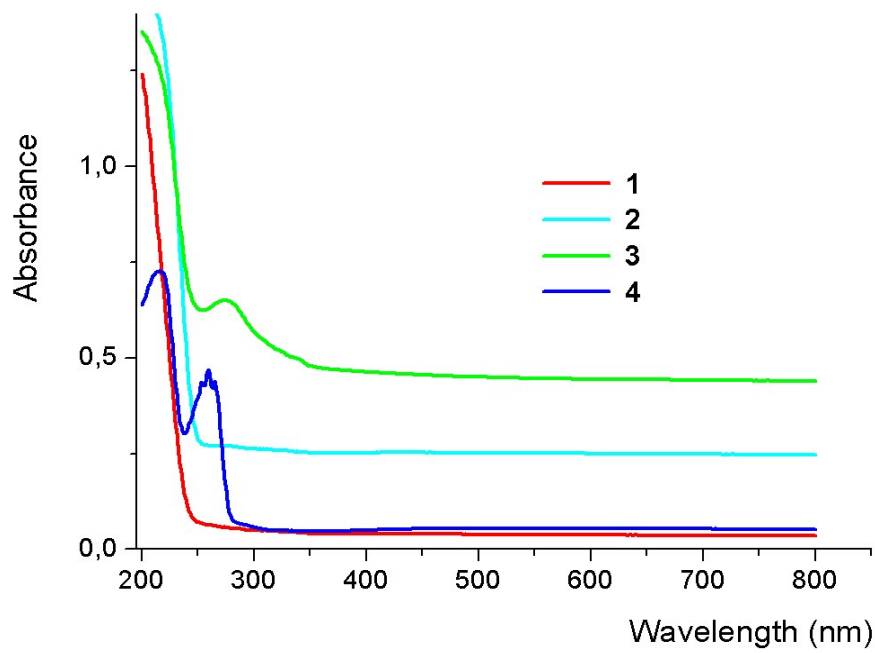

(a)

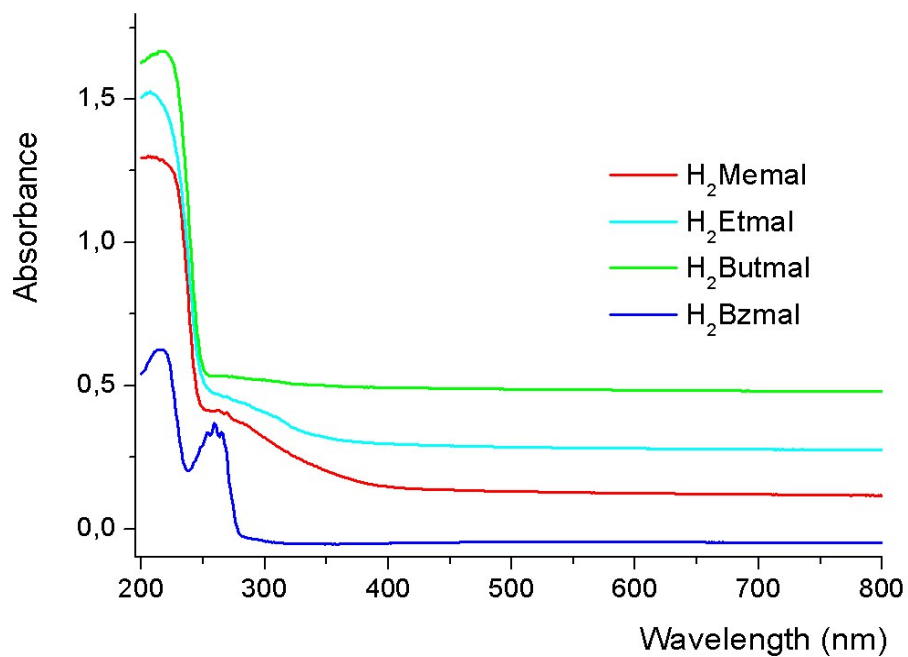

(b)

**Fig. S4.** (a) UV-Vis absorption spectra of the complexes **1** (red), **2** (cyan), **3** (green) and **4** (blue).; (b) UV-Vis absorption spectra of the Methyl-(H<sub>2</sub>Memal), ethyl- (H<sub>2</sub>Etmal), butyl-(H<sub>2</sub>Butmal) and benzyl malonic (H<sub>2</sub>Bzmal) acids. Some of the spectra are vertically shifted for clarity.



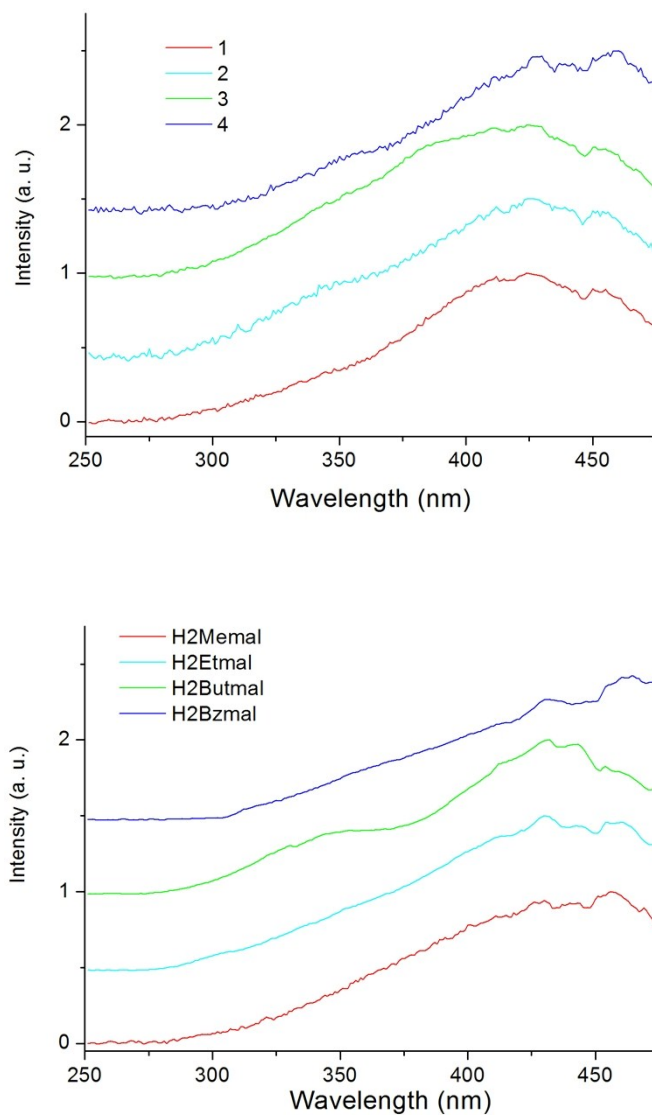

**Figure S5.** (a) UV-Vis excitation spectra of the complexes 1 (red), 2 (cyan), 3 (green) and 4 (blue) under detection at 500 nm; (b) UV-Vis excitation spectra of the Methyl-(H<sub>2</sub>Memal), ethyl- (H<sub>2</sub>Etmal), butyl- (H<sub>2</sub>Butmal) and benzyl malonic (H<sub>2</sub>Bzmal) acids under detection at 500 nm.
